# Supplementary material
Source: publisher site journal article supplement (http://kjim.org/upload/media/kjim-2023-197-Supplementary-Table-1.pdf)
Supplement: Supplementary file 1 [file kjim-2023-197-Supplementary-Table-1.pdf]

**Supplementary Table 1. Risk factors for GBPs among 392,913 participants**

| Risk factors                          | GBP ≥ 5 mm                         |         | GBP ≥ 10 mm                        |         | GBP, overall (< 5, 5–9, and ≥ 10 mm) |         |
|---------------------------------------|------------------------------------|---------|------------------------------------|---------|--------------------------------------|---------|
|                                       | Multivariable-adjusted OR (95% CI) | p value | Multivariable-adjusted OR (95% CI) | p value | Multivariable-adjusted OR (95% CI)   | p value |
| <b>Model 1<sup>a)</sup></b>           |                                    |         |                                    |         |                                      |         |
| Age (yr)                              | 1.00 (1.00–1.01)                   | 0.031   | 0.99 (0.98–1.01)                   | 0.406   | 1.02 (1.01–1.02)                     | < 0.001 |
| Male, sex                             | 1.83 (1.72–1.95)                   | < 0.001 | 1.76 (1.31–2.38)                   | < 0.001 | 1.75 (1.70–1.81)                     | < 0.001 |
| Current smoker                        | 1.07 (1.01–1.23)                   | 0.025   | 0.92 (0.70–1.21)                   | 0.559   | 1.04 (1.01–1.07)                     | 0.015   |
| Alcohol intake ≥ 20 g/d               | 0.93 (0.88–0.99)                   | 0.021   | 0.81 (0.59–1.10)                   | 0.180   | 0.95 (0.92–0.98)                     | 0.002   |
| HEPA                                  | 0.97 (0.91–1.03)                   | 0.315   | 0.98 (0.72–1.35)                   | 0.908   | 1.01 (0.97–1.04)                     | 0.734   |
| High education level                  | 1.39 (1.29–1.49)                   | < 0.001 | 1.29 (0.91–1.82)                   | 0.160   | 1.34 (1.29–1.38)                     | < 0.001 |
| Obesity (BMI ≥ 25 kg/m <sup>2</sup> ) | 1.18 (1.11–1.25)                   | < 0.001 | 1.05 (0.79–1.40)                   | 0.748   | 0.94 (0.91–0.97)                     | < 0.001 |
| Fatty liver                           | 1.23 (1.16–1.30)                   | < 0.001 | 1.37 (1.03–1.82)                   | 0.033   | 1.08 (1.05–1.12)                     | < 0.001 |
| Metabolic syndrome                    | 1.01 (0.94–1.09)                   | 0.760   | 1.14 (0.78–1.66)                   | 0.503   | 0.95 (0.91–0.99)                     | 0.011   |
| AST (U/L)                             | 0.99 (0.99–0.997)                  | < 0.001 | 0.97 (0.95–0.99)                   | 0.011   | 0.995 (0.993–0.997)                  | < 0.001 |
| ALT (U/L)                             | 1.00 (1.00–1.003)                  | 0.631   | 0.01 (1.00–1.02)                   | 0.111   | 0.998 (0.997–0.999)                  | 0.001   |
| HOMA-IR                               | 1.01 (1.00–1.03)                   | 0.046   | 0.99 (0.88–1.11)                   | 0.882   | 0.99 (0.98–1.01)                     | 0.323   |
| HBSAg                                 | 1.66 (1.49–1.85)                   | < 0.001 | 2.39 (1.53–3.75)                   | < 0.001 | 1.49 (1.41–1.59)                     | < 0.001 |
| <b>Model 2<sup>b)</sup></b>           |                                    |         |                                    |         |                                      |         |
| Age (yr)                              | 1.003 (1.000–1.006)                | 0.048   | 0.9 (0.98–1.01)                    | 0.338   | 1.01 (1.01–1.02)                     | < 0.001 |
| Male, sex                             | 1.82 (1.70–1.94)                   | < 0.001 | 1.72 (1.25–2.35)                   | 0.001   | 1.76 (1.70–1.82)                     | < 0.001 |
| Current smoker                        | 1.07 (1.01–1.13)                   | 0.020   | 0.95 (0.72–1.25)                   | 0.692   | 1.05 (1.02–1.08)                     | 0.003   |
| Alcohol intake ≥ 20 g/d               | 0.95 (0.89–1.01)                   | 0.071   | 0.84 (0.62–1.15)                   | 0.287   | 0.97 (0.94–0.998)                    | 0.036   |
| HEPA                                  | 0.97 (0.91–1.03)                   | 0.304   | 0.98 (0.71–1.34)                   | 0.896   | 1.00 (0.97–1.04)                     | 0.868   |
| High education level                  | 1.39 (1.29–1.49)                   | < 0.001 | 1.28 (0.90–1.82)                   | 0.165   | 1.34 (1.29–1.39)                     | < 0.001 |
| Obesity (BMI ≥ 25 kg/m <sup>2</sup> ) | 1.18 (1.12–1.25)                   | < 0.001 | 1.06 (0.80–1.40)                   | 0.686   | 0.94 (0.91–0.96)                     | < 0.001 |
| Fatty liver                           | 1.23 (1.16–1.31)                   | < 0.001 | 1.37 (1.03–1.84)                   | 0.032   | 1.09 (1.06–1.13)                     | < 0.001 |
| Total cholesterol (mg/dL)             | 1.01 (1.003–1.010)                 | < 0.001 | 1.01 (0.99–1.03)                   | 0.238   | 1.003 (1.001–1.005)                  | < 0.001 |
| LDL-C (mg/dL)                         | 0.99 (0.991–0.998)                 | 0.001   | 1.00 (0.98–1.01)                   | 0.598   | 0.997 (0.995–0.999)                  | 0.002   |
| HDL-C (mg/dL)                         | 0.99 (0.99–0.997)                  | < 0.001 | 0.99 (0.97–1.01)                   | 0.291   | 0.996 (0.994–0.998)                  | < 0.001 |
| Triglycerides (mg/dL)                 | 0.999 (0.998–0.999)                | < 0.001 | 1.00 (0.99–1.00)                   | 0.055   | 0.999 (0.998–0.999)                  | < 0.001 |
| AST (U/L)                             | 0.99 (0.99–0.997)                  | < 0.001 | 0.97 (0.95–0.99)                   | 0.012   | 0.998 (0.997–0.999)                  | 0.001   |
| ALT (U/L)                             | 1.00 (1.00–1.003)                  | 0.671   | 1.01 (0.96–1.02)                   | 0.129   | 1.00 (0.99–1.01)                     | 0.869   |
| HOMA-IR                               | 1.02 (1.002–1.03)                  | 0.022   | 1.01 (0.96–1.07)                   | 0.689   | 1.003 (1.001–1.005)                  | < 0.001 |
| HBSAg                                 | 1.65 (1.48–1.84)                   | < 0.001 | 2.36 (1.51–3.70)                   | < 0.001 | 1.48 (1.39–1.57)                     | < 0.001 |

ALT, alanine aminotransferase; AST, aspartate transaminase; BMI, body mass index; CI, confidence interval; GBP, gallbladder polyp; HBSAg, Hepatitis B surface antigen; HDL-C, high-density lipoprotein cholesterol; HEPA, health-enhancing physically active; HOMA-IR, homeostasis model assessment of insulin resistance; LDL-C, low-density lipoprotein cholesterol; OR, odds ratio.

<sup>a)</sup>The multivariate-adjusted model was adjusted for confounders including age, sex, smoking status, alcohol intake, physical activity, educational level, obesity, fatty liver, metabolic syndrome, AST, ALT, and HOMA-IR.

<sup>b)</sup>The multivariate-adjusted model was adjusted for confounders including age, sex, smoking status, alcohol intake, physical activity, educational level, obesity, fatty liver, total cholesterol, LDL-C, HDL-C, TG, AST, ALT, and HOMA-IR.
